# Supplementary material
Source: ML conference proceedings conference paper supplement (https://proceedings.mlr.press/v119/pfetsch20a.html)
Supplement: Supplementary file [file pfetsch20a-supp.pdf]

---

# Supplementary Material for IPBoost – Non-Convex Boosting via Integer Programming

---

Marc Pfetsch<sup>1</sup> Sebastian Pokutta<sup>2</sup>

## 1. Detailed Computational Results

In the following tables, we report detailed computational results for our tests. We report problem size statistics in Table 1 and running time statistics in Table 2.

For  $\rho = 0.1, 0.075, 0.05, 0.025, 0.01$ , we present train results in Tables 3, 5, 7, 11 and test results in Tables 4, 6, 8, 12.

---

<sup>1</sup>Department of Mathematics, TU Darmstadt, Germany <sup>2</sup>Department of Mathematics, TU Berlin and Zuse Institute Berlin, Berlin, Germany. Correspondence to: Marc Pfetsch <pfetsch@opt.tu-darmstadt.de>, Sebastian Pokutta <pokutta@zib.de>.

Supplementary Material for IPBoost

Table 1. Statistics on LIBSVM instances.

| name                | train set |         |          |         | test set |         |          |         |
|---------------------|-----------|---------|----------|---------|----------|---------|----------|---------|
|                     | $d$       | $N$     | class -1 | class 1 | $d$      | $N$     | class -1 | class 1 |
| a1a                 | 119       | 1605    | 1210     | 395     | -        | -       | -        | -       |
| a2a                 | 119       | 2265    | 1693     | 572     | -        | -       | -        | -       |
| a3a                 | 122       | 3185    | 2412     | 773     | -        | -       | -        | -       |
| a4a                 | 122       | 4781    | 3593     | 1188    | -        | -       | -        | -       |
| a5a                 | 122       | 6414    | 4845     | 1569    | -        | -       | -        | -       |
| a6a                 | 122       | 11 220  | 8528     | 2692    | -        | -       | -        | -       |
| a7a                 | 122       | 16 100  | 12 182   | 3918    | -        | -       | -        | -       |
| a9a                 | 123       | 32 561  | 24 720   | 7841    | -        | -       | -        | -       |
| australian_scale    | 14        | 690     | 383      | 307     | -        | -       | -        | -       |
| breast-cancer_scale | 10        | 683     | 444      | 239     | -        | -       | -        | -       |
| cod-rna             | 8         | 59 535  | 39 690   | 19 845  | 8        | 271 617 | 181 078  | 90 539  |
| colon-cancer        | 2000      | 62      | 40       | 22      | -        | -       | -        | -       |
| duke                | 7129      | 44      | 21       | 23      | 7129     | 38      | 16       | 22      |
| german.numer        | 24        | 1000    | 700      | 300     | -        | -       | -        | -       |
| gisette_scale       | 5000      | 6000    | 3000     | 3000    | 5000     | 1000    | 500      | 500     |
| diabetes_scale      | 8         | 768     | 268      | 500     | -        | -       | -        | -       |
| fourclass_scale     | 2         | 862     | 555      | 307     | -        | -       | -        | -       |
| german.numer_scale  | 24        | 1000    | 700      | 300     | -        | -       | -        | -       |
| heart_scale         | 13        | 270     | 150      | 120     | -        | -       | -        | -       |
| ijcnn1              | 22        | 49 990  | 45 137   | 4853    | 22       | 91 701  | 82 989   | 8712    |
| ionosphere_scale    | 34        | 351     | 126      | 225     | -        | -       | -        | -       |
| leu                 | 7129      | 38      | 11       | 27      | 7129     | 34      | 14       | 20      |
| liver-disorders     | 5         | 145     | 90       | 55      | 5        | 200     | 100      | 100     |
| madelon             | 500       | 2000    | 1000     | 1000    | 500      | 600     | 300      | 300     |
| phishing            | 68        | 11 055  | 4898     | 6157    | -        | -       | -        | -       |
| skin_nonskin        | 3         | 245 057 | 50 859   | 194 198 | -        | -       | -        | -       |
| sonar_scale         | 60        | 208     | 111      | 97      | -        | -       | -        | -       |
| splice              | 60        | 1000    | 483      | 517     | 60       | 2175    | 1044     | 1131    |
| svmguidel           | 4         | 3089    | 1089     | 2000    | 4        | 4000    | 2000     | 2000    |
| svmguidel3          | 22        | 1243    | 947      | 296     | 22       | 41      | 41       | 0       |
| w1a                 | 300       | 2477    | 2405     | 72      | 300      | 47 272  | 45 865   | 1407    |
| w2a                 | 300       | 3470    | 3363     | 107     | 300      | 46 279  | 44 907   | 1372    |
| w3a                 | 300       | 4912    | 4769     | 143     | 300      | 44 837  | 43 501   | 1336    |
| w4a                 | 300       | 7366    | 7150     | 216     | 300      | 42 383  | 41 120   | 1263    |
| w5a                 | 300       | 9888    | 9607     | 281     | 300      | 39 861  | 38 663   | 1198    |
| w8a                 | 300       | 49 749  | 48 270   | 1479    | 300      | 14 951  | 14 497   | 454     |

**Supplementary Material for IPBoost**

Table 2. Statistics for LIBSVM on average run times (in seconds) of different algorithms with  $\rho = 0.05$  for 10 different seeds; “# optimal” gives the number of instances solved to optimality, “# time out” the number of instances that ran into the time limit of 1 hour, and “best sol. time” the average time at which the best solution was found.

| name                | IPBoost    |          |           |            |                | LPBoost time | AdaBoost time |
|---------------------|------------|----------|-----------|------------|----------------|--------------|---------------|
|                     | total time | # nodes  | # optimal | # time out | best sol. time |              |               |
| a1a                 | 97.26      | 6669.9   | 0         | 0          | 26.08          | 0.15         | 0.40          |
| a2a                 | 257.97     | 8186.6   | 0         | 0          | 128.55         | 0.26         | 0.59          |
| a3a                 | 464.05     | 9096.6   | 0         | 0          | 230.18         | 0.37         | 0.59          |
| a4a                 | 770.89     | 9769.9   | 0         | 0          | 381.76         | 0.73         | 0.83          |
| a5a                 | 904.72     | 10 186.5 | 0         | 0          | 465.58         | 1.11         | 1.16          |
| a6a                 | 1712.09    | 7763.4   | 0         | 1          | 736.32         | 2.76         | 1.76          |
| a7a                 | 2946.71    | 8986.1   | 0         | 3          | 1542.57        | 5.40         | 2.74          |
| a8a                 | 3251.73    | 6370.4   | 0         | 8          | 2217.36        | 9.33         | 3.51          |
| a9a                 | 3247.98    | 4094.4   | 0         | 7          | 1461.27        | 17.96        | 4.89          |
| australian_scale    | 66.84      | 7400.4   | 1         | 0          | 23.78          | 0.07         | 0.17          |
| breast-cancer_scale | 435.32     | 7183.9   | 0         | 1          | 29.21          | 0.06         | 0.15          |
| cod-rna             | 3603.83    | 77.4     | 0         | 10         | 304.28         | 3281.72      | 30.13         |
| colon-cancer        | 0.09       | 6.8      | 10        | 0          | 0.02           | 0.04         | 0.21          |
| duke                | 0.25       | 7.9      | 10        | 0          | 0.03           | 0.14         | 0.37          |
| german.numer        | 78.61      | 7215.8   | 0         | 0          | 19.77          | 0.09         | 0.20          |
| gisette_scale       | 3439.67    | 3709.8   | 0         | 8          | 1991.59        | 18.87        | 16.31         |
| diabetes_scale      | 116.58     | 7313.7   | 0         | 0          | 47.29          | 0.07         | 0.17          |
| fourclass_scale     | 165.46     | 9932.6   | 0         | 0          | 102.16         | 0.07         | 0.16          |
| german.numer_scale  | 120.73     | 9495.2   | 0         | 0          | 62.95          | 0.09         | 0.20          |
| heart_scale         | 43.55      | 10 170.0 | 0         | 0          | 21.58          | 0.03         | 0.14          |
| ijcnn1              | 3604.29    | 1197.2   | 0         | 10         | 708.19         | 206.01       | 5.95          |
| ionosphere_scale    | 67.56      | 7375.7   | 0         | 0          | 24.33          | 0.08         | 0.16          |
| leu                 | 0.20       | 5.8      | 10        | 0          | 0.02           | 0.11         | 0.34          |
| liver-disorders     | 48.69      | 9768.9   | 0         | 0          | 24.51          | 0.04         | 0.14          |
| madelon             | 2387.03    | 7619.7   | 0         | 5          | 1354.16        | 1.59         | 0.90          |
| mushrooms           | 968.38     | 6761.5   | 0         | 0          | 248.43         | 2.45         | 1.42          |
| phishing            | 977.76     | 6726.0   | 0         | 0          | 268.98         | 3.76         | 1.03          |
| skin_nonskin        | 3576.38    | 2251.6   | 0         | 8          | 861.25         | 2967.50      | 9.39          |
| sonar_scale         | 61.81      | 6531.4   | 0         | 0          | 19.13          | 0.07         | 0.15          |
| splICE              | 128.63     | 5767.6   | 0         | 0          | 25.33          | 0.32         | 0.28          |
| svmguidel           | 1375.33    | 9187.1   | 0         | 0          | 685.39         | 0.97         | 0.39          |
| svmguidel3          | 671.57     | 10 522.1 | 0         | 0          | 400.04         | 0.38         | 0.22          |
| w1a                 | 673.90     | 8291.2   | 0         | 0          | 240.40         | 3.28         | 6.05          |
| w2a                 | 927.73     | 7860.0   | 0         | 0          | 353.33         | 3.53         | 6.23          |
| w3a                 | 1665.23    | 8071.0   | 0         | 0          | 601.93         | 3.80         | 6.30          |
| w4a                 | 2442.22    | 8113.1   | 0         | 3          | 1256.18        | 3.97         | 6.36          |
| w5a                 | 2583.16    | 8091.4   | 0         | 2          | 1027.12        | 4.53         | 6.55          |
| w6a                 | 3607.69    | 5791.5   | 0         | 10         | 1881.83        | 6.17         | 7.42          |
| w7a                 | 3607.88    | 4362.3   | 0         | 10         | 2106.27        | 7.79         | 7.97          |
| w8a                 | 3611.46    | 3204.5   | 0         | 10         | 2022.04        | 18.14        | 11.50         |
| averages            | 1367.78    | 6528.4   | 0.8       | 2.4        | 597.53         | 164.35       | 3.59          |

Supplementary Material for IPBoost

Table 3. Averages of the *train* accuracies and standard deviations for three algorithms with  $\rho = 0.1$  for 10 different seeds on LIBSVM; best solutions are marked with \*; using class probabilities for prediction and voting.

| name                | IPBoost |               |          | LPBoost |               |          | AdaBoost |              |          |
|---------------------|---------|---------------|----------|---------|---------------|----------|----------|--------------|----------|
|                     |         | score         | <i>L</i> |         | score         | <i>L</i> |          | score        | <i>L</i> |
| a1a                 | *       | 79.23 ± 1.93  | 4.8      |         | 77.41 ± 1.23  | 4.1      |          | 77.31 ±1.00  | 9.3      |
| a2a                 | *       | 78.20 ± 1.82  | 4.1      |         | 77.00 ± 1.79  | 5.7      |          | 76.42 ±0.94  | 9.6      |
| a3a                 | *       | 77.42 ± 1.02  | 4.2      |         | 76.41 ± 0.80  | 4.6      |          | 77.00 ±1.10  | 10.9     |
| a4a                 | *       | 77.02 ± 1.03  | 4.0      |         | 75.89 ± 0.82  | 4.6      |          | 76.84 ±1.07  | 11.0     |
| a5a                 | *       | 77.75 ± 0.97  | 4.3      |         | 76.39 ± 0.87  | 4.0      |          | 77.19 ±0.99  | 11.0     |
| a6a                 | *       | 77.45 ± 0.79  | 3.9      |         | 76.99 ± 1.02  | 4.3      |          | 77.30 ±1.03  | 11.0     |
| a7a                 | *       | 77.11 ± 1.00  | 3.7      |         | 76.37 ± 1.08  | 3.8      | *        | 77.11 ±1.09  | 11.0     |
| a8a                 | *       | 77.89 ± 2.84  | 2.9      |         | 76.00 ± 0.32  | 3.8      |          | 76.56 ±0.61  | 11.0     |
| a9a                 | *       | 77.34 ± 2.20  | 3.0      |         | 76.09 ± 0.34  | 3.6      |          | 76.58 ±0.65  | 10.9     |
| australian_scale    | *       | 76.56 ± 10.27 | 4.4      |         | 74.55 ± 9.16  | 4.7      |          | 76.03 ±8.71  | 24.1     |
| breast-cancer_scale | *       | 95.89 ± 1.46  | 6.2      |         | 95.32 ± 1.50  | 8.4      |          | 95.27 ±1.65  | 20.2     |
| cod-rna             |         | 67.89 ± 3.82  | 1.3      |         | 67.87 ± 3.80  | 2.4      | *        | 68.00 ±4.21  | 55.3     |
| colon-cancer        |         | 99.00 ± 1.41  | 7.6      |         | 95.20 ± 3.01  | 6.4      | *        | 100.00 ±0.00 | 58.7     |
| duke                |         | 99.09 ± 1.59  | 6.4      |         | 95.91 ± 2.79  | 4.8      | *        | 100.00 ±0.00 | 56.7     |
| german.numer        | *       | 71.65 ± 1.41  | 4.3      |         | 70.66 ± 1.19  | 3.9      |          | 71.34 ±1.62  | 19.1     |
| gisetete_scale      | *       | 82.38 ± 4.23  | 4.8      |         | 79.49 ± 6.40  | 9.1      |          | 82.23 ±3.26  | 95.1     |
| diabetes_scale      |         | 69.20 ± 4.23  | 4.2      |         | 69.28 ± 3.85  | 4.9      | *        | 73.54 ±3.60  | 46.2     |
| fourclass_scale     |         | 73.16 ± 1.93  | 3.1      |         | 73.65 ± 1.79  | 4.2      | *        | 76.41 ±1.40  | 38.0     |
| german.numer_scale  | *       | 71.66 ± 1.43  | 4.6      |         | 70.66 ± 1.19  | 3.9      |          | 71.34 ±1.62  | 19.1     |
| heart_scale         | *       | 77.27 ± 3.83  | 4.3      |         | 75.05 ± 3.57  | 4.6      |          | 77.13 ±5.64  | 20.1     |
| ijcnn1              |         | 90.31 ± 0.08  | 3.5      | *       | 90.45 ± 0.46  | 5.3      |          | 90.34 ±0.06  | 71.6     |
| ionosphere_scale    |         | 90.00 ± 2.89  | 6.4      |         | 89.61 ± 2.89  | 10.3     | *        | 97.62 ±2.07  | 49.1     |
| leu                 |         | 98.42 ± 1.84  | 3.4      |         | 92.37 ± 3.15  | 2.7      | *        | 100.00 ±0.00 | 36.9     |
| liver-disorders     |         | 77.17 ± 1.76  | 5.4      |         | 75.93 ± 2.61  | 6.2      | *        | 84.83 ±1.81  | 37.5     |
| madelon             |         | 55.80 ± 2.57  | 6.0      |         | 55.08 ± 2.85  | 3.1      | *        | 67.29 ±1.79  | 97.2     |
| mushrooms           | *       | 86.78 ± 9.01  | 5.2      |         | 78.89 ± 10.42 | 6.1      |          | 77.60 ±6.31  | 9.7      |
| phishing            | *       | 79.39 ± 10.55 | 2.5      |         | 76.63 ± 12.79 | 3.9      |          | 71.67 ±8.51  | 8.0      |
| skin_nonskin        |         | 83.04 ± 4.50  | 2.4      |         | 82.88 ± 4.69  | 3.1      | *        | 83.33 ±4.64  | 50.4     |
| sonar_scale         |         | 79.34 ± 4.62  | 5.1      |         | 80.36 ± 4.25  | 13.0     | *        | 99.46 ±0.82  | 64.6     |
| splice              |         | 65.68 ± 7.26  | 3.7      |         | 64.68 ± 7.70  | 6.5      | *        | 66.89 ±6.23  | 21.0     |
| svmguide1           |         | 92.61 ± 3.80  | 5.5      |         | 92.28 ± 4.00  | 6.5      | *        | 92.92 ±3.71  | 62.9     |
| svmguide3           |         | 78.87 ± 1.46  | 4.8      |         | 78.21 ± 1.32  | 6.0      | *        | 81.36 ±2.38  | 70.7     |
| w1a                 | *       | 97.76 ± 0.14  | 6.6      |         | 97.47 ± 0.18  | 5.3      |          | 97.31 ±0.15  | 14.9     |
| w2a                 | *       | 97.54 ± 0.14  | 6.1      |         | 97.22 ± 0.16  | 4.8      |          | 97.13 ±0.10  | 15.5     |
| w3a                 | *       | 97.56 ± 0.17  | 6.1      |         | 97.31 ± 0.10  | 5.3      |          | 97.25 ±0.12  | 16.1     |
| w4a                 | *       | 97.52 ± 0.12  | 6.0      |         | 97.28 ± 0.08  | 5.5      |          | 97.21 ±0.10  | 16.1     |
| w5a                 | *       | 97.56 ± 0.07  | 6.3      |         | 97.29 ± 0.05  | 4.6      |          | 97.28 ±0.10  | 16.1     |
| w6a                 | *       | 97.32 ± 0.13  | 5.9      |         | 97.16 ± 0.11  | 5.7      |          | 97.11 ±0.13  | 16.1     |
| w7a                 | *       | 97.38 ± 0.12  | 5.9      |         | 97.18 ± 0.11  | 5.5      |          | 97.16 ±0.11  | 16.1     |
| w8a                 | *       | 97.40 ± 0.12  | 5.8      |         | 97.21 ± 0.10  | 5.6      |          | 97.19 ±0.11  | 16.5     |
| averages            | 25      | 83.52 ± 2.51  | 4.7      | 1       | 82.29 ± 2.61  | 5.3      | 15       | 84.36 ±1.99  | 31.4     |

Supplementary Material for IPBoost

Table 4. Averages of the *test* accuracies and standard deviations for three algorithms with  $\rho = 0.1$  for 10 different seeds on LIBSVM; best solutions are marked with \*; using class probabilities for prediction and voting.

| name                |    | IPBoost       |     |          | LPBoost         |              |          | AdaBoost        |              |          |
|---------------------|----|---------------|-----|----------|-----------------|--------------|----------|-----------------|--------------|----------|
|                     |    | score         |     | <i>L</i> | score           |              | <i>L</i> | score           |              | <i>L</i> |
| a1a                 | *  | 78.32 ± 3.25  | 4.8 |          | 76.70 ± 2.94    | 4.1          |          | 76.04 ± 3.30    | 9.3          |          |
| a2a                 | *  | 77.88 ± 2.23  | 4.1 |          | 76.51 ± 2.30    | 5.7          |          | 75.67 ± 1.57    | 9.6          |          |
| a3a                 | *  | 77.47 ± 1.39  | 4.2 |          | 75.64 ± 1.62    | 4.6          |          | 76.84 ± 1.03    | 10.9         |          |
| a4a                 | *  | 76.44 ± 1.93  | 4.0 |          | 75.23 ± 1.75    | 4.6          |          | 76.18 ± 1.72    | 11.0         |          |
| a5a                 | *  | 77.18 ± 1.51  | 4.3 |          | 75.70 ± 1.85    | 4.0          |          | 76.72 ± 1.77    | 11.0         |          |
| a6a                 |    | 77.77 ± 1.22  | 3.9 |          | 77.58 ± 1.35    | 4.3          |          | * 77.84 ± 1.31  | 11.0         |          |
| a7a                 |    | 77.23 ± 1.26  | 3.7 |          | 76.52 ± 1.10    | 3.8          |          | * 77.28 ± 1.39  | 11.0         |          |
| a8a                 | *  | 77.96 ± 2.69  | 2.9 |          | 75.97 ± 0.49    | 3.8          |          | 76.46 ± 0.64    | 11.0         |          |
| a9a                 | *  | 77.35 ± 2.29  | 3.0 |          | 76.24 ± 0.58    | 3.6          |          | 76.54 ± 0.82    | 10.9         |          |
| australian_scale    | *  | 75.00 ± 10.15 | 4.4 |          | 72.32 ± 9.84    | 4.7          |          | 72.61 ± 9.54    | 24.1         |          |
| breast-cancer_scale | *  | 93.97 ± 1.89  | 6.2 |          | 93.09 ± 2.53    | 8.4          |          | 93.01 ± 2.48    | 20.2         |          |
| cod-rna             |    | 67.82 ± 3.66  | 1.3 |          | 67.78 ± 3.51    | 2.4          |          | * 67.94 ± 4.03  | 55.3         |          |
| colon-cancer        |    | 71.67 ± 13.15 | 7.6 |          | 70.83 ± 9.82    | 6.4          |          | * 76.67 ± 14.59 | 58.7         |          |
| duke                |    | 98.95 ± 1.84  | 6.4 |          | 95.53 ± 3.05    | 4.8          |          | * 100.00 ± 0.00 | 56.7         |          |
| german.numer        | *  | 72.35 ± 3.64  | 4.3 |          | 71.90 ± 3.26    | 3.9          |          | 71.80 ± 3.32    | 19.1         |          |
| gisetete_scale      | *  | 81.40 ± 4.69  | 4.8 |          | 79.05 ± 5.96    | 9.1          |          | 80.40 ± 3.62    | 95.1         |          |
| diabetes_scale      |    | 67.32 ± 6.22  | 4.2 |          | * 68.04 ± 4.97  | 4.9          |          | 66.80 ± 5.07    | 46.2         |          |
| fourclass_scale     |    | 72.33 ± 5.19  | 3.1 |          | * 72.44 ± 4.29  | 4.2          |          | 72.09 ± 4.02    | 38.0         |          |
| german.numer_scale  | *  | 72.25 ± 3.63  | 4.6 |          | 71.90 ± 3.26    | 3.9          |          | 71.80 ± 3.32    | 19.1         |          |
| heart_scale         | *  | 73.70 ± 6.52  | 4.3 |          | 71.30 ± 4.80    | 4.6          |          | 69.81 ± 5.09    | 20.1         |          |
| ijcnn1              |    | 90.34 ± 0.22  | 3.5 |          | * 90.63 ± 0.89  | 5.3          |          | 90.30 ± 0.28    | 71.6         |          |
| ionosphere_scale    |    | 84.71 ± 5.43  | 6.4 |          | 85.57 ± 4.18    | 10.3         |          | * 86.71 ± 4.86  | 49.1         |          |
| leu                 |    | 70.29 ± 7.26  | 3.4 |          | 73.24 ± 8.48    | 2.7          |          | * 80.88 ± 7.50  | 36.9         |          |
| liver-disorders     |    | 54.35 ± 2.70  | 5.4 |          | * 55.95 ± 3.20  | 6.2          |          | 55.90 ± 3.02    | 37.5         |          |
| madelon             |    | 53.30 ± 4.44  | 6.0 |          | * 53.67 ± 4.22  | 3.1          |          | 52.12 ± 1.82    | 97.2         |          |
| mushrooms           | *  | 87.08 ± 8.65  | 5.2 |          | 79.35 ± 10.05   | 6.1          |          | 77.70 ± 6.29    | 9.7          |          |
| phishing            | *  | 79.02 ± 10.87 | 2.5 |          | 76.63 ± 12.76   | 3.9          |          | 71.27 ± 8.52    | 8.0          |          |
| skin_nonskin        |    | 83.06 ± 4.56  | 2.4 |          | 82.91 ± 4.76    | 3.1          |          | * 83.35 ± 4.71  | 50.4         |          |
| sonar_scale         |    | 66.83 ± 8.54  | 5.1 |          | * 69.27 ± 9.14  | 13.0         |          | 63.90 ± 11.14   | 64.6         |          |
| splice              |    | 65.14 ± 7.83  | 3.7 |          | 64.67 ± 8.02    | 6.5          |          | * 65.19 ± 6.65  | 21.0         |          |
| svmguide1           | *  | 90.77 ± 4.88  | 5.5 |          | 90.69 ± 4.78    | 6.5          |          | 90.40 ± 5.01    | 62.9         |          |
| svmguide3           |    | 79.76 ± 18.54 | 4.8 |          | * 86.10 ± 16.78 | 6.0          |          | 63.90 ± 23.36   | 70.7         |          |
| w1a                 | *  | 97.29 ± 0.17  | 6.6 |          | 97.21 ± 0.12    | 5.3          |          | 97.11 ± 0.14    | 14.9         |          |
| w2a                 | *  | 97.38 ± 0.13  | 6.1 |          | 97.21 ± 0.09    | 4.8          |          | 97.15 ± 0.11    | 15.5         |          |
| w3a                 | *  | 97.35 ± 0.11  | 6.1 |          | 97.21 ± 0.10    | 5.3          |          | 97.18 ± 0.11    | 16.1         |          |
| w4a                 | *  | 97.37 ± 0.16  | 6.0 |          | 97.18 ± 0.10    | 5.5          |          | 97.17 ± 0.12    | 16.1         |          |
| w5a                 | *  | 97.37 ± 0.11  | 6.3 |          | 97.13 ± 0.08    | 4.6          |          | 97.14 ± 0.11    | 16.1         |          |
| w6a                 | *  | 97.38 ± 0.13  | 5.9 |          | 97.23 ± 0.09    | 5.7          |          | 97.22 ± 0.11    | 16.1         |          |
| w7a                 | *  | 97.39 ± 0.12  | 5.9 |          | 97.21 ± 0.10    | 5.5          |          | 97.21 ± 0.11    | 16.1         |          |
| w8a                 | *  | 97.26 ± 0.12  | 5.8 |          | 97.13 ± 0.10    | 5.6          |          | 97.12 ± 0.10    | 16.5         |          |
| averages            | 24 | 80.70 ± 4.08  | 4.7 |          | 7               | 80.16 ± 3.93 | 5.3      | 9               | 79.79 ± 3.82 | 31.4     |

Supplementary Material for IPBoost

Table 5. Averages of the *train* accuracies and standard deviations for three algorithms with  $\rho = 0.075$  for 10 different seeds on LIBSVM; best solutions are marked with \*; using class probabilities for prediction and voting.

| name                |    | IPBoost      |          | LPBoost        |          | AdaBoost        |          |
|---------------------|----|--------------|----------|----------------|----------|-----------------|----------|
|                     |    | score        | <i>L</i> | score          | <i>L</i> | score           | <i>L</i> |
| a1a                 | *  | 79.35 ± 2.14 | 5.5      | 77.37 ± 1.20   | 4.7      | 77.31 ± 1.00    | 9.3      |
| a2a                 | *  | 78.68 ± 1.60 | 5.4      | 77.25 ± 1.88   | 6.3      | 76.42 ± 0.94    | 9.6      |
| a3a                 | *  | 78.05 ± 1.11 | 6.0      | 76.43 ± 0.82   | 5.0      | 77.00 ± 1.10    | 10.9     |
| a4a                 | *  | 77.73 ± 0.95 | 6.0      | 75.90 ± 0.82   | 4.5      | 76.84 ± 1.07    | 11.0     |
| a5a                 | *  | 78.18 ± 1.28 | 5.3      | 76.40 ± 0.87   | 4.4      | 77.19 ± 0.99    | 11.0     |
| a6a                 | *  | 77.68 ± 0.99 | 4.6      | 76.73 ± 0.95   | 3.9      | 77.30 ± 1.03    | 11.0     |
| a7a                 | *  | 77.45 ± 1.22 | 5.4      | 76.37 ± 1.08   | 3.7      | 77.11 ± 1.09    | 11.0     |
| a8a                 | *  | 77.84 ± 2.45 | 3.6      | 76.01 ± 0.32   | 3.8      | 76.56 ± 0.61    | 11.0     |
| a9a                 | *  | 76.87 ± 1.76 | 3.0      | 76.09 ± 0.34   | 3.6      | 76.58 ± 0.65    | 10.9     |
| australian_scale    |    | 76.00 ± 9.33 | 5.6      | 74.66 ± 9.10   | 4.9      | * 76.03 ± 8.71  | 24.1     |
| breast-cancer_scale | *  | 96.36 ± 1.01 | 7.5      | 95.36 ± 1.51   | 9.7      | 95.27 ± 1.65    | 20.2     |
| cod-rna             |    | 67.89 ± 3.82 | 1.5      | 67.87 ± 3.80   | 2.4      | * 68.00 ± 4.21  | 55.3     |
| colon-cancer        |    | 98.80 ± 1.40 | 6.3      | 94.40 ± 1.58   | 5.1      | * 100.00 ± 0.00 | 58.7     |
| duke                |    | 98.41 ± 1.87 | 5.9      | 96.14 ± 2.84   | 5.0      | * 100.00 ± 0.00 | 56.7     |
| german.numer        | *  | 71.84 ± 1.64 | 5.1      | 70.67 ± 1.19   | 4.2      | 71.34 ± 1.62    | 19.1     |
| gisette_scale       | *  | 83.14 ± 3.31 | 5.5      | 81.94 ± 4.56   | 13.5     | 82.23 ± 3.26    | 95.1     |
| diabetes_scale      |    | 69.98 ± 4.30 | 5.7      | 69.67 ± 4.12   | 5.3      | * 73.54 ± 3.60  | 46.2     |
| fourclass_scale     |    | 74.13 ± 1.81 | 4.0      | 74.26 ± 1.43   | 5.5      | * 76.41 ± 1.40  | 38.0     |
| german.numer_scale  | *  | 71.73 ± 1.51 | 5.5      | 70.67 ± 1.19   | 4.2      | 71.34 ± 1.62    | 19.1     |
| heart_scale         | *  | 78.84 ± 3.54 | 6.3      | 75.42 ± 3.80   | 5.3      | 77.13 ± 5.64    | 20.1     |
| ijcnn1              |    | 90.42 ± 0.23 | 4.4      | * 90.45 ± 0.46 | 6.1      | 90.34 ± 0.06    | 71.6     |
| ionosphere_scale    |    | 91.28 ± 2.72 | 7.1      | 91.00 ± 2.98   | 13.9     | * 97.62 ± 2.07  | 49.1     |
| leu                 |    | 98.68 ± 1.86 | 3.4      | 92.37 ± 3.15   | 2.7      | * 100.00 ± 0.00 | 36.9     |
| liver-disorders     |    | 78.14 ± 2.03 | 6.7      | 76.07 ± 2.43   | 7.4      | * 84.83 ± 1.81  | 37.5     |
| madelon             |    | 56.13 ± 2.84 | 9.9      | 55.47 ± 2.88   | 3.6      | * 67.29 ± 1.79  | 97.2     |
| mushrooms           | *  | 88.14 ± 7.75 | 6.0      | 79.50 ± 10.21  | 6.0      | 77.60 ± 6.31    | 9.7      |
| phishing            | *  | 83.89 ± 7.85 | 3.5      | 76.54 ± 12.87  | 4.1      | 71.67 ± 8.51    | 8.0      |
| skin_nonskin        |    | 83.04 ± 4.54 | 2.0      | 82.91 ± 4.73   | 3.6      | * 83.33 ± 4.64  | 50.4     |
| sonar_scale         |    | 80.30 ± 4.68 | 6.1      | 83.11 ± 4.81   | 17.6     | * 99.46 ± 0.82  | 64.6     |
| splice              |    | 65.83 ± 7.11 | 4.8      | 64.76 ± 7.64   | 7.2      | * 66.89 ± 6.23  | 21.0     |
| svmguide1           |    | 92.73 ± 3.73 | 6.3      | 92.34 ± 3.90   | 6.8      | * 92.92 ± 3.71  | 62.9     |
| svmguide3           |    | 79.40 ± 1.59 | 6.4      | 78.54 ± 1.24   | 7.0      | * 81.36 ± 2.38  | 70.7     |
| w1a                 | *  | 97.88 ± 0.15 | 7.9      | 97.46 ± 0.20   | 5.6      | 97.31 ± 0.15    | 14.9     |
| w2a                 | *  | 97.67 ± 0.21 | 8.5      | 97.23 ± 0.18   | 5.0      | 97.13 ± 0.10    | 15.5     |
| w3a                 | *  | 97.65 ± 0.16 | 7.9      | 97.31 ± 0.11   | 6.0      | 97.25 ± 0.12    | 16.1     |
| w4a                 | *  | 97.59 ± 0.10 | 8.4      | 97.28 ± 0.09   | 5.8      | 97.21 ± 0.10    | 16.1     |
| w5a                 | *  | 97.61 ± 0.12 | 7.6      | 97.30 ± 0.05   | 4.8      | 97.28 ± 0.10    | 16.1     |
| w6a                 | *  | 97.45 ± 0.15 | 7.9      | 97.16 ± 0.11   | 5.8      | 97.11 ± 0.13    | 16.1     |
| w7a                 | *  | 97.43 ± 0.11 | 7.2      | 97.19 ± 0.11   | 5.6      | 97.16 ± 0.11    | 16.1     |
| w8a                 | *  | 97.42 ± 0.12 | 7.2      | 97.21 ± 0.10   | 5.7      | 97.19 ± 0.11    | 16.5     |
| averages            | 24 | 83.94 ± 2.38 | 5.8      | 1 82.52 ± 2.54 | 5.9      | 15 84.36 ± 1.99 | 31.4     |

Supplementary Material for IPBoost

Table 6. Averages of the *test* accuracies and standard deviations for three algorithms with  $\rho = 0.075$  for 10 different seeds on LIBSVM; best solutions are marked with \*; using class probabilities for prediction and voting.

| name                |    | IPBoost       |     |          | LPBoost         |              |          | AdaBoost        |              |          |
|---------------------|----|---------------|-----|----------|-----------------|--------------|----------|-----------------|--------------|----------|
|                     |    | score         |     | <i>L</i> | score           |              | <i>L</i> | score           |              | <i>L</i> |
| a1a                 | *  | 78.60 ± 3.49  | 5.5 |          | 76.73 ± 2.94    | 4.7          |          | 76.04 ± 3.30    | 9.3          |          |
| a2a                 | *  | 78.28 ± 1.69  | 5.4 |          | 76.62 ± 2.35    | 6.3          |          | 75.67 ± 1.57    | 9.6          |          |
| a3a                 | *  | 77.60 ± 1.19  | 6.0 |          | 75.60 ± 1.60    | 5.0          |          | 76.84 ± 1.03    | 10.9         |          |
| a4a                 | *  | 76.90 ± 2.10  | 6.0 |          | 75.23 ± 1.75    | 4.5          |          | 76.18 ± 1.72    | 11.0         |          |
| a5a                 | *  | 77.46 ± 1.71  | 5.3 |          | 75.73 ± 1.87    | 4.4          |          | 76.72 ± 1.77    | 11.0         |          |
| a6a                 | *  | 78.08 ± 1.23  | 4.6 |          | 77.42 ± 1.05    | 3.9          |          | 77.84 ± 1.31    | 11.0         |          |
| a7a                 | *  | 77.52 ± 1.33  | 5.4 |          | 76.52 ± 1.10    | 3.7          |          | 77.28 ± 1.39    | 11.0         |          |
| a8a                 | *  | 77.84 ± 2.40  | 3.6 |          | 75.97 ± 0.49    | 3.8          |          | 76.46 ± 0.64    | 11.0         |          |
| a9a                 | *  | 76.91 ± 2.09  | 3.0 |          | 76.24 ± 0.58    | 3.6          |          | 76.54 ± 0.82    | 10.9         |          |
| australian_scale    |    | 72.46 ± 9.38  | 5.6 |          | 72.54 ± 9.86    | 4.9          |          | * 72.61 ± 9.54  | 24.1         |          |
| breast-cancer_scale | *  | 93.46 ± 2.18  | 7.5 |          | 93.24 ± 2.13    | 9.7          |          | 93.01 ± 2.48    | 20.2         |          |
| cod-rna             |    | 67.82 ± 3.66  | 1.5 |          | 67.77 ± 3.50    | 2.4          |          | * 67.94 ± 4.03  | 55.3         |          |
| colon-cancer        |    | 70.83 ± 9.82  | 6.3 |          | 71.67 ± 10.54   | 5.1          |          | * 76.67 ± 14.59 | 58.7         |          |
| duke                |    | 98.16 ± 2.17  | 5.9 |          | 95.79 ± 3.09    | 5.0          |          | * 100.00 ± 0.00 | 56.7         |          |
| german.numer        | *  | 72.50 ± 3.44  | 5.1 |          | 71.85 ± 3.22    | 4.2          |          | 71.80 ± 3.32    | 19.1         |          |
| gissette_scale      | *  | 82.38 ± 4.17  | 5.5 |          | 81.28 ± 4.22    | 13.5         |          | 80.40 ± 3.62    | 95.1         |          |
| diabetes_scale      |    | 66.80 ± 5.09  | 5.7 |          | * 67.58 ± 4.02  | 5.3          |          | 66.80 ± 5.07    | 46.2         |          |
| fourclass_scale     |    | 72.50 ± 4.64  | 4.0 |          | * 73.08 ± 3.80  | 5.5          |          | 72.09 ± 4.02    | 38.0         |          |
| german.numer_scale  | *  | 72.10 ± 3.21  | 5.5 |          | 71.85 ± 3.22    | 4.2          |          | 71.80 ± 3.32    | 19.1         |          |
| heart_scale         | *  | 71.48 ± 6.88  | 6.3 |          | 71.11 ± 4.55    | 5.3          |          | 69.81 ± 5.09    | 20.1         |          |
| ijcnn1              |    | 90.42 ± 0.34  | 4.4 |          | * 90.60 ± 0.90  | 6.1          |          | 90.30 ± 0.28    | 71.6         |          |
| ionosphere_scale    |    | 86.14 ± 5.68  | 7.1 |          | 86.14 ± 5.47    | 13.9         |          | * 86.71 ± 4.86  | 49.1         |          |
| leu                 |    | 71.18 ± 7.57  | 3.4 |          | 73.24 ± 8.48    | 2.7          |          | * 80.88 ± 7.50  | 36.9         |          |
| liver-disorders     |    | 54.90 ± 3.16  | 6.7 |          | 55.85 ± 3.11    | 7.4          |          | * 55.90 ± 3.02  | 37.5         |          |
| madelon             |    | 52.88 ± 4.27  | 9.9 |          | * 53.45 ± 4.24  | 3.6          |          | 52.12 ± 1.82    | 97.2         |          |
| mushrooms           | *  | 88.17 ± 8.18  | 6.0 |          | 79.76 ± 9.96    | 6.0          |          | 77.70 ± 6.29    | 9.7          |          |
| phishing            | *  | 83.72 ± 8.15  | 3.5 |          | 76.46 ± 12.91   | 4.1          |          | 71.27 ± 8.52    | 8.0          |          |
| skin_nonskin        |    | 83.03 ± 4.61  | 2.0 |          | 82.94 ± 4.79    | 3.6          |          | * 83.35 ± 4.71  | 50.4         |          |
| sonar_scale         |    | 67.32 ± 9.97  | 6.1 |          | * 69.76 ± 8.70  | 17.6         |          | 63.90 ± 11.14   | 64.6         |          |
| splice              |    | 65.03 ± 7.84  | 4.8 |          | 64.69 ± 8.00    | 7.2          |          | * 65.19 ± 6.65  | 21.0         |          |
| svmguide1           | *  | 90.93 ± 4.72  | 6.3 |          | 90.92 ± 4.48    | 6.8          |          | 90.40 ± 5.01    | 62.9         |          |
| svmguide3           |    | 78.29 ± 18.09 | 6.4 |          | * 83.17 ± 17.83 | 7.0          |          | 63.90 ± 23.36   | 70.7         |          |
| w1a                 | *  | 97.31 ± 0.22  | 7.9 |          | 97.19 ± 0.11    | 5.6          |          | 97.11 ± 0.14    | 14.9         |          |
| w2a                 | *  | 97.45 ± 0.14  | 8.5 |          | 97.21 ± 0.09    | 5.0          |          | 97.15 ± 0.11    | 15.5         |          |
| w3a                 | *  | 97.40 ± 0.14  | 7.9 |          | 97.20 ± 0.11    | 6.0          |          | 97.18 ± 0.11    | 16.1         |          |
| w4a                 | *  | 97.46 ± 0.11  | 8.4 |          | 97.20 ± 0.10    | 5.8          |          | 97.17 ± 0.12    | 16.1         |          |
| w5a                 | *  | 97.42 ± 0.14  | 7.6 |          | 97.14 ± 0.08    | 4.8          |          | 97.14 ± 0.11    | 16.1         |          |
| w6a                 | *  | 97.47 ± 0.14  | 7.9 |          | 97.23 ± 0.09    | 5.8          |          | 97.22 ± 0.11    | 16.1         |          |
| w7a                 | *  | 97.42 ± 0.08  | 7.2 |          | 97.21 ± 0.11    | 5.6          |          | 97.21 ± 0.11    | 16.1         |          |
| w8a                 | *  | 97.27 ± 0.13  | 7.2 |          | 97.13 ± 0.11    | 5.7          |          | 97.12 ± 0.10    | 16.5         |          |
| averages            | 25 | 80.77 ± 3.89  | 5.8 |          | 6               | 80.21 ± 3.89 | 5.9      | 9               | 79.79 ± 3.82 | 31.4     |

Supplementary Material for IPBoost

Table 7. Averages of the *train* accuracies and standard deviations for three algorithms with  $\rho = 0.05$  for 10 different seeds on LIBSVM; best solutions are marked with \*; using class probabilities for prediction and voting.

| name                | IPBoost |               |          | LPBoost |               |          | AdaBoost |              |          |
|---------------------|---------|---------------|----------|---------|---------------|----------|----------|--------------|----------|
|                     |         | score         | <i>L</i> |         | score         | <i>L</i> |          | score        | <i>L</i> |
| a1a                 | *       | 79.97 ± 1.80  | 7.0      |         | 77.41 ± 1.23  | 4.6      |          | 77.31 ±1.00  | 9.3      |
| a2a                 | *       | 79.06 ± 1.73  | 6.2      |         | 76.66 ± 1.01  | 6.5      |          | 76.42 ±0.94  | 9.6      |
| a3a                 | *       | 78.67 ± 1.08  | 7.9      |         | 76.37 ± 0.83  | 5.0      |          | 77.00 ±1.10  | 10.9     |
| a4a                 | *       | 78.24 ± 1.27  | 7.8      |         | 75.93 ± 0.82  | 4.8      |          | 76.84 ±1.07  | 11.0     |
| a5a                 | *       | 78.46 ± 1.18  | 7.8      |         | 76.41 ± 0.87  | 4.4      |          | 77.19 ±0.99  | 11.0     |
| a6a                 | *       | 77.94 ± 0.84  | 6.7      |         | 76.94 ± 0.96  | 4.9      |          | 77.30 ±1.03  | 11.0     |
| a7a                 | *       | 77.69 ± 1.05  | 7.1      |         | 76.37 ± 1.09  | 4.2      |          | 77.11 ±1.09  | 11.0     |
| a8a                 | *       | 78.11 ± 2.44  | 4.5      |         | 76.01 ± 0.32  | 4.1      |          | 76.56 ±0.61  | 11.0     |
| a9a                 |         | 76.31 ± 0.58  | 2.9      |         | 76.09 ± 0.34  | 3.7      | *        | 76.58 ±0.65  | 10.9     |
| australian_scale    | *       | 77.52 ± 9.86  | 7.3      |         | 74.86 ± 8.97  | 5.8      |          | 76.03 ±8.71  | 24.1     |
| breast-cancer_scale | *       | 96.49 ± 1.43  | 9.6      |         | 95.63 ± 1.56  | 9.8      |          | 95.27 ±1.65  | 20.2     |
| cod-rna             | *       | 68.10 ± 4.49  | 1.8      |         | 67.90 ± 3.91  | 2.4      |          | 68.00 ±4.21  | 55.3     |
| colon-cancer        |         | 98.20 ± 1.48  | 5.5      |         | 94.20 ± 1.48  | 5.1      | *        | 100.00 ±0.00 | 58.7     |
| duke                |         | 97.73 ± 1.86  | 5.6      |         | 96.14 ± 2.84  | 5.0      | *        | 100.00 ±0.00 | 56.7     |
| german.numer        | *       | 71.90 ± 1.92  | 6.5      |         | 70.67 ± 1.19  | 4.4      |          | 71.34 ±1.62  | 19.1     |
| gisetete_scale      | *       | 84.60 ± 2.93  | 7.0      |         | 83.90 ± 3.73  | 20.9     |          | 82.23 ±3.26  | 95.1     |
| diabetes_scale      |         | 71.07 ± 3.75  | 7.4      |         | 69.93 ± 3.89  | 6.6      | *        | 73.54 ±3.60  | 46.2     |
| fourclass_scale     |         | 76.29 ± 1.56  | 8.6      |         | 74.33 ± 1.58  | 6.1      | *        | 76.41 ±1.40  | 38.0     |
| german.numer_scale  | *       | 72.01 ± 1.98  | 6.5      |         | 70.68 ± 1.19  | 4.4      |          | 71.34 ±1.62  | 19.1     |
| heart_scale         | *       | 81.02 ± 2.90  | 7.3      |         | 75.79 ± 4.08  | 6.4      |          | 77.13 ±5.64  | 20.1     |
| ijcnn1              | *       | 90.47 ± 0.47  | 5.8      | *       | 90.47 ± 0.45  | 7.9      |          | 90.34 ±0.06  | 71.6     |
| ionosphere_scale    |         | 92.56 ± 2.59  | 9.2      |         | 92.21 ± 3.06  | 19.5     | *        | 97.62 ±2.07  | 49.1     |
| leu                 |         | 98.68 ± 1.86  | 3.5      |         | 92.37 ± 3.15  | 2.7      | *        | 100.00 ±0.00 | 36.9     |
| liver-disorders     |         | 80.28 ± 2.16  | 9.1      |         | 77.38 ± 2.00  | 9.5      | *        | 84.83 ±1.81  | 37.5     |
| madelon             |         | 56.45 ± 3.08  | 31.4     |         | 56.69 ± 2.67  | 14.0     | *        | 67.28 ±1.79  | 97.2     |
| mushrooms           | *       | 87.86 ± 7.83  | 8.6      |         | 81.60 ± 8.18  | 7.0      |          | 77.60 ±6.31  | 9.7      |
| phishing            | *       | 80.86 ± 10.96 | 3.5      |         | 76.96 ± 12.46 | 4.0      |          | 71.67 ±8.51  | 8.0      |
| skin_nonskin        |         | 83.12 ± 4.60  | 2.5      |         | 82.91 ± 4.73  | 3.7      | *        | 83.33 ±4.64  | 50.4     |
| sonar_scale         |         | 83.53 ± 3.76  | 12.3     |         | 88.08 ± 4.43  | 25.4     | *        | 99.46 ±0.82  | 64.6     |
| splice              |         | 66.25 ± 6.92  | 5.0      |         | 65.74 ± 6.97  | 7.6      | *        | 66.89 ±6.23  | 21.0     |
| svmguide1           |         | 92.90 ± 3.78  | 8.6      |         | 92.53 ± 3.84  | 6.9      | *        | 92.92 ±3.71  | 62.9     |
| svmguide3           |         | 79.69 ± 1.79  | 8.6      |         | 78.65 ± 1.35  | 8.9      | *        | 81.36 ±2.38  | 70.7     |
| w1a                 | *       | 98.07 ± 0.19  | 10.8     |         | 97.46 ± 0.18  | 5.2      |          | 97.31 ±0.15  | 14.9     |
| w2a                 | *       | 97.78 ± 0.22  | 10.7     |         | 97.25 ± 0.17  | 5.5      |          | 97.13 ±0.10  | 15.5     |
| w3a                 | *       | 97.75 ± 0.16  | 11.0     |         | 97.33 ± 0.15  | 6.6      |          | 97.25 ±0.12  | 16.1     |
| w4a                 | *       | 97.67 ± 0.13  | 10.9     |         | 97.31 ± 0.10  | 6.0      |          | 97.21 ±0.10  | 16.1     |
| w5a                 | *       | 97.68 ± 0.13  | 11.1     |         | 97.32 ± 0.08  | 5.0      |          | 97.28 ±0.10  | 16.1     |
| w6a                 | *       | 97.49 ± 0.16  | 10.2     |         | 97.17 ± 0.11  | 5.7      |          | 97.11 ±0.13  | 16.1     |
| w7a                 | *       | 97.48 ± 0.12  | 10.1     |         | 97.19 ± 0.12  | 5.6      |          | 97.16 ±0.11  | 16.1     |
| w8a                 | *       | 97.52 ± 0.11  | 9.8      |         | 97.20 ± 0.10  | 5.6      |          | 97.19 ±0.11  | 16.5     |
| averages            | 26      | 84.34 ± 2.43  | 8.1      | 1       | 82.90 ± 2.40  | 7.0      | 14       | 84.36 ±1.99  | 31.4     |



Supplementary Material for IPBoost

Table 8. Averages of the *test* accuracies and standard deviations for three algorithms with  $\rho = 0.05$  for 10 different seeds on LIBSVM; best solutions are marked with \*; using class probabilities for prediction and voting.

| name                | IPBoost |               |          | LPBoost |               |          | AdaBoost |               |          |
|---------------------|---------|---------------|----------|---------|---------------|----------|----------|---------------|----------|
|                     | *       | score         | <i>L</i> | *       | score         | <i>L</i> | *        | score         | <i>L</i> |
| a1a                 | *       | 79.10 ± 3.44  | 7.0      |         | 76.70 ± 2.99  | 4.6      |          | 76.04 ± 3.30  | 9.3      |
| a2a                 | *       | 78.08 ± 2.22  | 6.2      |         | 75.83 ± 2.36  | 6.5      |          | 75.67 ± 1.57  | 9.6      |
| a3a                 | *       | 78.32 ± 1.42  | 7.9      |         | 75.54 ± 1.46  | 5.0      |          | 76.84 ± 1.03  | 10.9     |
| a4a                 | *       | 77.55 ± 2.21  | 7.8      |         | 75.26 ± 1.78  | 4.8      |          | 76.18 ± 1.72  | 11.0     |
| a5a                 | *       | 77.39 ± 1.25  | 7.8      |         | 75.74 ± 1.88  | 4.4      |          | 76.72 ± 1.77  | 11.0     |
| a6a                 | *       | 78.48 ± 1.13  | 6.7      |         | 77.54 ± 1.27  | 4.9      |          | 77.84 ± 1.31  | 11.0     |
| a7a                 | *       | 77.86 ± 1.20  | 7.1      |         | 76.52 ± 1.10  | 4.2      |          | 77.28 ± 1.39  | 11.0     |
| a8a                 | *       | 77.98 ± 2.37  | 4.5      |         | 75.97 ± 0.49  | 4.1      |          | 76.46 ± 0.64  | 11.0     |
| a9a                 |         | 76.36 ± 0.67  | 2.9      |         | 76.24 ± 0.58  | 3.7      | *        | 76.54 ± 0.82  | 10.9     |
| australian_scale    | *       | 74.35 ± 10.93 | 7.3      |         | 72.75 ± 9.47  | 5.8      |          | 72.61 ± 9.54  | 24.1     |
| breast-cancer_scale | *       | 93.97 ± 2.19  | 9.6      |         | 93.68 ± 1.90  | 9.8      |          | 93.01 ± 2.48  | 20.2     |
| cod-rna             | *       | 68.08 ± 4.48  | 1.8      |         | 67.82 ± 3.64  | 2.4      |          | 67.94 ± 4.03  | 55.3     |
| colon-cancer        |         | 75.00 ± 13.03 | 5.5      |         | 72.50 ± 11.82 | 5.1      | *        | 76.67 ± 14.59 | 58.7     |
| duke                |         | 97.37 ± 2.15  | 5.6      |         | 95.79 ± 3.09  | 5.0      | *        | 100.00 ± 0.00 | 56.7     |
| german.numer        |         | 71.65 ± 3.67  | 6.5      | *       | 71.85 ± 3.22  | 4.4      |          | 71.80 ± 3.32  | 19.1     |
| gisetete_scale      | *       | 83.69 ± 3.52  | 7.0      |         | 83.14 ± 3.84  | 20.9     |          | 80.40 ± 3.62  | 95.1     |
| diabetes_scale      |         | 66.93 ± 5.60  | 7.4      | *       | 67.84 ± 3.47  | 6.6      |          | 66.80 ± 5.07  | 46.2     |
| fourclass_scale     |         | 72.38 ± 4.59  | 8.6      | *       | 73.43 ± 3.73  | 6.1      |          | 72.09 ± 4.02  | 38.0     |
| german.numer_scale  | *       | 71.85 ± 3.57  | 6.5      | *       | 71.85 ± 3.22  | 4.4      |          | 71.80 ± 3.32  | 19.1     |
| heart_scale         | *       | 73.89 ± 7.43  | 7.3      |         | 71.11 ± 4.55  | 6.4      |          | 69.81 ± 5.09  | 20.1     |
| ijcnn1              | *       | 90.60 ± 0.92  | 5.8      |         | 90.52 ± 0.93  | 7.9      |          | 90.30 ± 0.28  | 71.6     |
| ionosphere_scale    |         | 85.43 ± 5.16  | 9.2      |         | 85.86 ± 4.88  | 19.5     | *        | 86.71 ± 4.86  | 49.1     |
| leu                 |         | 70.59 ± 7.59  | 3.5      |         | 73.24 ± 8.48  | 2.7      | *        | 80.88 ± 7.50  | 36.9     |
| liver-disorders     |         | 54.25 ± 2.85  | 9.1      |         | 55.70 ± 2.37  | 9.5      | *        | 55.90 ± 3.02  | 37.5     |
| madelon             |         | 52.40 ± 4.42  | 31.4     | *       | 52.78 ± 4.16  | 14.0     |          | 52.12 ± 1.82  | 97.2     |
| mushrooms           | *       | 87.91 ± 7.92  | 8.6      |         | 81.77 ± 7.78  | 7.0      |          | 77.70 ± 6.29  | 9.7      |
| phishing            | *       | 80.85 ± 10.96 | 3.5      |         | 76.66 ± 12.71 | 4.0      |          | 71.27 ± 8.52  | 8.0      |
| skin_nonskin        |         | 83.15 ± 4.65  | 2.5      |         | 82.94 ± 4.79  | 3.7      | *        | 83.35 ± 4.71  | 50.4     |
| sonar_scale         |         | 66.34 ± 8.03  | 12.3     | *       | 68.78 ± 7.07  | 25.4     |          | 63.90 ± 11.14 | 64.6     |
| splice              |         | 65.13 ± 7.75  | 5.0      |         | 65.01 ± 7.78  | 7.6      | *        | 65.19 ± 6.65  | 21.0     |
| svmguide1           | *       | 90.93 ± 4.81  | 8.6      |         | 90.70 ± 4.66  | 6.9      |          | 90.40 ± 5.01  | 62.9     |
| svmguide3           |         | 73.66 ± 19.30 | 8.6      | *       | 83.90 ± 16.87 | 8.9      |          | 63.90 ± 23.36 | 70.7     |
| w1a                 | *       | 97.37 ± 0.26  | 10.8     |         | 97.16 ± 0.13  | 5.2      |          | 97.11 ± 0.14  | 14.9     |
| w2a                 | *       | 97.49 ± 0.21  | 10.7     |         | 97.20 ± 0.13  | 5.5      |          | 97.15 ± 0.11  | 15.5     |
| w3a                 | *       | 97.48 ± 0.15  | 11.0     |         | 97.22 ± 0.11  | 6.6      |          | 97.18 ± 0.11  | 16.1     |
| w4a                 | *       | 97.47 ± 0.12  | 10.9     |         | 97.21 ± 0.11  | 6.0      |          | 97.17 ± 0.12  | 16.1     |
| w5a                 | *       | 97.49 ± 0.15  | 11.1     |         | 97.16 ± 0.10  | 5.0      |          | 97.14 ± 0.11  | 16.1     |
| w6a                 | *       | 97.53 ± 0.13  | 10.2     |         | 97.23 ± 0.09  | 5.7      |          | 97.22 ± 0.11  | 16.1     |
| w7a                 | *       | 97.48 ± 0.10  | 10.1     |         | 97.21 ± 0.11  | 5.6      |          | 97.21 ± 0.11  | 16.1     |
| w8a                 | *       | 97.37 ± 0.11  | 9.8      |         | 97.12 ± 0.11  | 5.6      |          | 97.12 ± 0.10  | 16.5     |
| averages            | 26      | 80.78 ± 4.07  | 8.1      | 7       | 80.31 ± 3.73  | 7.0      | 8        | 79.79 ± 3.82  | 31.4     |

Supplementary Material for IPBoost

Table 9. Averages of the *train* accuracies and standard deviations for three algorithms with  $\rho = 0.025$  for 10 different seeds on LIBSVM; best solutions are marked with \*; using class probabilities for prediction and voting.

| name                |    | IPBoost       |      |   | LPBoost       |      |    | AdaBoost        |      |  |
|---------------------|----|---------------|------|---|---------------|------|----|-----------------|------|--|
|                     |    | score         | $L$  |   | score         | $L$  |    | score           | $L$  |  |
| a1a                 | *  | 80.80 ± 1.83  | 10.8 |   | 77.38 ± 1.21  | 4.9  |    | 77.31 ± 1.00    | 9.3  |  |
| a2a                 | *  | 79.71 ± 1.46  | 10.7 |   | 76.72 ± 1.02  | 5.7  |    | 76.42 ± 0.94    | 9.6  |  |
| a3a                 | *  | 78.77 ± 1.20  | 11.9 |   | 76.43 ± 0.82  | 4.9  |    | 77.00 ± 1.10    | 10.9 |  |
| a4a                 | *  | 78.26 ± 1.42  | 11.4 |   | 75.90 ± 0.82  | 4.6  |    | 76.84 ± 1.07    | 11.0 |  |
| a5a                 | *  | 78.99 ± 1.46  | 11.6 |   | 76.41 ± 0.87  | 4.5  |    | 77.19 ± 0.99    | 11.0 |  |
| a6a                 | *  | 78.06 ± 1.17  | 8.6  |   | 76.75 ± 0.96  | 4.6  |    | 77.30 ± 1.03    | 11.0 |  |
| a7a                 | *  | 77.56 ± 1.08  | 8.6  |   | 76.37 ± 1.09  | 4.3  |    | 77.11 ± 1.09    | 11.0 |  |
| a8a                 | *  | 78.66 ± 3.08  | 5.9  |   | 76.01 ± 0.32  | 4.3  |    | 76.56 ± 0.61    | 11.0 |  |
| a9a                 | *  | 77.11 ± 1.81  | 5.2  |   | 76.09 ± 0.34  | 3.5  |    | 76.58 ± 0.65    | 10.9 |  |
| australian_scale    | *  | 78.24 ± 9.62  | 9.0  |   | 75.27 ± 8.74  | 7.2  |    | 76.03 ± 8.71    | 24.1 |  |
| breast-cancer_scale | *  | 96.82 ± 1.49  | 11.9 |   | 95.89 ± 1.62  | 12.1 |    | 95.27 ± 1.65    | 20.2 |  |
| cod-rna             | *  | 68.13 ± 4.59  | 2.2  |   | 67.90 ± 3.90  | 3.3  |    | 68.00 ± 4.21    | 55.3 |  |
| colon-cancer        |    | 97.60 ± 1.26  | 5.4  |   | 94.20 ± 1.48  | 5.1  |    | * 100.00 ± 0.00 | 58.7 |  |
| duke                |    | 95.91 ± 2.58  | 5.1  |   | 95.23 ± 2.92  | 4.8  |    | * 100.00 ± 0.00 | 56.7 |  |
| german.numer        | *  | 72.25 ± 1.76  | 8.2  |   | 70.91 ± 1.35  | 4.6  |    | 71.34 ± 1.62    | 19.1 |  |
| gisetete_scale      |    | 85.06 ± 3.48  | 13.2 | * | 85.31 ± 4.74  | 42.6 |    | 82.23 ± 3.26    | 95.1 |  |
| diabetes_scale      |    | 72.49 ± 3.36  | 12.1 |   | 71.01 ± 3.73  | 11.2 |    | * 73.54 ± 3.60  | 46.2 |  |
| fourclass_scale     | *  | 76.88 ± 1.26  | 11.1 |   | 75.59 ± 1.47  | 7.7  |    | 76.41 ± 1.40    | 38.0 |  |
| german.numer_scale  | *  | 72.29 ± 1.78  | 8.4  |   | 70.91 ± 1.35  | 4.6  |    | 71.34 ± 1.62    | 19.1 |  |
| heart_scale         | *  | 80.14 ± 4.41  | 9.3  |   | 76.81 ± 4.89  | 7.9  |    | 77.13 ± 5.64    | 20.1 |  |
| ijcnn1              | *  | 90.56 ± 0.62  | 11.9 |   | 90.53 ± 0.60  | 12.8 |    | 90.34 ± 0.06    | 71.6 |  |
| ionosphere_scale    |    | 95.12 ± 2.41  | 21.9 |   | 95.09 ± 2.39  | 36.1 |    | * 97.62 ± 2.07  | 49.1 |  |
| leu                 |    | 98.68 ± 1.86  | 3.3  |   | 92.37 ± 3.15  | 2.7  |    | * 100.00 ± 0.00 | 36.9 |  |
| liver-disorders     |    | 83.10 ± 2.28  | 14.4 |   | 79.93 ± 1.94  | 12.8 |    | * 84.83 ± 1.81  | 37.5 |  |
| madelon             |    | 57.26 ± 3.17  | 9.4  |   | 59.02 ± 2.24  | 34.7 |    | * 67.28 ± 1.79  | 97.2 |  |
| mushrooms           | *  | 92.71 ± 5.86  | 12.3 |   | 81.88 ± 9.32  | 7.7  |    | 77.60 ± 6.31    | 9.7  |  |
| phishing            | *  | 80.02 ± 10.35 | 5.8  |   | 77.03 ± 12.40 | 3.9  |    | 71.67 ± 8.51    | 8.0  |  |
| skin_nonskin        |    | 83.20 ± 4.69  | 3.8  |   | 83.00 ± 4.84  | 4.2  |    | * 83.33 ± 4.64  | 50.4 |  |
| sonar_scale         |    | 91.02 ± 3.30  | 42.1 |   | 92.93 ± 3.79  | 42.8 |    | * 99.46 ± 0.82  | 64.6 |  |
| splice              | *  | 67.26 ± 6.44  | 7.7  |   | 66.28 ± 6.61  | 9.7  |    | 66.89 ± 6.23    | 21.0 |  |
| svmguide1           | *  | 93.11 ± 3.74  | 12.0 |   | 92.71 ± 3.76  | 13.9 |    | 92.92 ± 3.71    | 62.9 |  |
| svmguide3           |    | 80.29 ± 1.69  | 12.7 |   | 79.61 ± 1.60  | 13.0 |    | * 81.36 ± 2.38  | 70.7 |  |
| w1a                 | *  | 98.24 ± 0.19  | 20.4 |   | 97.44 ± 0.17  | 4.9  |    | 97.31 ± 0.15    | 14.9 |  |
| w2a                 | *  | 97.98 ± 0.21  | 16.7 |   | 97.29 ± 0.21  | 5.9  |    | 97.13 ± 0.10    | 15.5 |  |
| w3a                 | *  | 97.94 ± 0.19  | 17.7 |   | 97.31 ± 0.15  | 5.5  |    | 97.25 ± 0.12    | 16.1 |  |
| w4a                 | *  | 97.83 ± 0.14  | 17.5 |   | 97.32 ± 0.10  | 5.5  |    | 97.21 ± 0.10    | 16.1 |  |
| w5a                 | *  | 97.79 ± 0.17  | 17.5 |   | 97.33 ± 0.09  | 5.3  |    | 97.28 ± 0.10    | 16.1 |  |
| w6a                 | *  | 97.62 ± 0.11  | 16.9 |   | 97.17 ± 0.11  | 5.7  |    | 97.11 ± 0.13    | 16.1 |  |
| w7a                 | *  | 97.60 ± 0.15  | 14.8 |   | 97.20 ± 0.12  | 5.6  |    | 97.16 ± 0.11    | 16.1 |  |
| w8a                 | *  | 97.58 ± 0.11  | 14.1 |   | 97.23 ± 0.10  | 6.0  |    | 97.19 ± 0.11    | 16.5 |  |
| averages            | 29 | 84.97 ± 2.44  | 11.8 | 1 | 83.39 ± 2.43  | 9.8  | 10 | 84.36 ± 1.99    | 31.4 |  |

Supplementary Material for IPBoost

Table 10. Averages of the *test* accuracies and standard deviations for three algorithms with  $\rho = 0.025$  for 10 different seeds on LIBSVM; best solutions are marked with \*; using class probabilities for prediction and voting.

| name                |    | IPBoost       |      |   | LPBoost       |              |     | AdaBoost        |              |      |
|---------------------|----|---------------|------|---|---------------|--------------|-----|-----------------|--------------|------|
|                     |    | score         | $L$  |   | score         | $L$          |     | score           | $L$          |      |
| a1a                 | *  | 80.12 ± 2.80  | 10.8 |   | 76.70 ± 2.99  | 4.9          |     | 76.04 ± 3.30    | 9.3          |      |
| a2a                 | *  | 78.98 ± 1.83  | 10.7 |   | 75.96 ± 2.26  | 5.7          |     | 75.67 ± 1.57    | 9.6          |      |
| a3a                 | *  | 78.15 ± 1.64  | 11.9 |   | 75.60 ± 1.60  | 4.9          |     | 76.84 ± 1.03    | 10.9         |      |
| a4a                 | *  | 76.98 ± 1.75  | 11.4 |   | 75.23 ± 1.75  | 4.6          |     | 76.18 ± 1.72    | 11.0         |      |
| a5a                 | *  | 77.81 ± 1.72  | 11.6 |   | 75.74 ± 1.88  | 4.5          |     | 76.72 ± 1.77    | 11.0         |      |
| a6a                 | *  | 78.40 ± 1.23  | 8.6  |   | 77.44 ± 1.04  | 4.6          |     | 77.84 ± 1.31    | 11.0         |      |
| a7a                 | *  | 77.61 ± 1.08  | 8.6  |   | 76.52 ± 1.10  | 4.3          |     | 77.28 ± 1.39    | 11.0         |      |
| a8a                 | *  | 78.67 ± 2.93  | 5.9  |   | 75.97 ± 0.49  | 4.3          |     | 76.46 ± 0.64    | 11.0         |      |
| a9a                 | *  | 77.18 ± 1.97  | 5.2  |   | 76.24 ± 0.58  | 3.5          |     | 76.54 ± 0.82    | 10.9         |      |
| australian_scale    | *  | 74.28 ± 10.40 | 9.0  |   | 72.68 ± 9.54  | 7.2          |     | 72.61 ± 9.54    | 24.1         |      |
| breast-cancer_scale | *  | 93.46 ± 1.85  | 11.9 |   | 93.38 ± 1.70  | 12.1         |     | 93.01 ± 2.48    | 20.2         |      |
| cod-rna             | *  | 68.11 ± 4.60  | 2.2  |   | 67.81 ± 3.63  | 3.3          |     | 67.94 ± 4.03    | 55.3         |      |
| colon-cancer        |    | 70.00 ± 9.78  | 5.4  |   | 73.33 ± 10.97 | 5.1          |     | * 76.67 ± 14.59 | 58.7         |      |
| duke                |    | 95.79 ± 2.54  | 5.1  |   | 94.74 ± 3.28  | 4.8          |     | * 100.00 ± 0.00 | 56.7         |      |
| german.numer        |    | 71.65 ± 3.07  | 8.2  |   | 71.70 ± 3.21  | 4.6          |     | * 71.80 ± 3.32  | 19.1         |      |
| gisetete_scale      |    | 84.29 ± 3.58  | 13.2 | * | 84.35 ± 4.95  | 42.6         |     | 80.40 ± 3.62    | 95.1         |      |
| diabetes_scale      |    | 66.27 ± 4.58  | 12.1 | * | 67.45 ± 3.56  | 11.2         |     | 66.80 ± 5.07    | 46.2         |      |
| fourclass_scale     |    | 71.74 ± 4.67  | 11.1 | * | 72.44 ± 4.19  | 7.7          |     | 72.09 ± 4.02    | 38.0         |      |
| german.numer_scale  |    | 71.55 ± 3.13  | 8.4  |   | 71.70 ± 3.21  | 4.6          |     | * 71.80 ± 3.32  | 19.1         |      |
| heart_scale         |    | 70.56 ± 7.33  | 9.3  | * | 71.30 ± 4.96  | 7.9          |     | 69.81 ± 5.09    | 20.1         |      |
| ijcnn1              | *  | 90.51 ± 0.79  | 11.9 |   | 90.49 ± 0.81  | 12.8         |     | 90.30 ± 0.28    | 71.6         |      |
| ionosphere_scale    |    | 85.57 ± 6.48  | 21.9 |   | 85.43 ± 5.75  | 36.1         |     | * 86.71 ± 4.86  | 49.1         |      |
| leu                 |    | 70.88 ± 8.02  | 3.3  |   | 73.24 ± 8.48  | 2.7          |     | * 80.88 ± 7.50  | 36.9         |      |
| liver-disorders     |    | 54.85 ± 2.49  | 14.4 |   | 55.80 ± 2.39  | 12.8         |     | * 55.90 ± 3.02  | 37.5         |      |
| madelon             | *  | 52.83 ± 3.83  | 9.4  |   | 52.60 ± 4.13  | 34.7         |     | 52.12 ± 1.82    | 97.2         |      |
| mushrooms           | *  | 92.83 ± 6.11  | 12.3 |   | 81.94 ± 9.51  | 7.7          |     | 77.70 ± 6.29    | 9.7          |      |
| phishing            | *  | 79.46 ± 10.76 | 5.8  |   | 76.95 ± 12.43 | 3.9          |     | 71.27 ± 8.52    | 8.0          |      |
| skin_nonskin        |    | 83.23 ± 4.76  | 3.8  |   | 83.03 ± 4.91  | 4.2          |     | * 83.35 ± 4.71  | 50.4         |      |
| sonar_scale         |    | 67.56 ± 7.97  | 42.1 | * | 70.24 ± 11.02 | 42.8         |     | 63.90 ± 11.14   | 64.6         |      |
| splice              |    | 65.26 ± 7.52  | 7.7  | * | 65.38 ± 7.51  | 9.7          |     | 65.19 ± 6.65    | 21.0         |      |
| svmguide1           | *  | 90.55 ± 4.78  | 12.0 |   | 90.33 ± 4.62  | 13.9         |     | 90.40 ± 5.01    | 62.9         |      |
| svmguide3           |    | 70.00 ± 20.44 | 12.7 | * | 79.02 ± 17.10 | 13.0         |     | 63.90 ± 23.36   | 70.7         |      |
| w1a                 | *  | 97.30 ± 0.20  | 20.4 |   | 97.17 ± 0.12  | 4.9          |     | 97.11 ± 0.14    | 14.9         |      |
| w2a                 | *  | 97.47 ± 0.19  | 16.7 |   | 97.27 ± 0.14  | 5.9          |     | 97.15 ± 0.11    | 15.5         |      |
| w3a                 | *  | 97.53 ± 0.16  | 17.7 |   | 97.20 ± 0.12  | 5.5          |     | 97.18 ± 0.11    | 16.1         |      |
| w4a                 | *  | 97.58 ± 0.17  | 17.5 |   | 97.20 ± 0.12  | 5.5          |     | 97.17 ± 0.12    | 16.1         |      |
| w5a                 | *  | 97.52 ± 0.15  | 17.5 |   | 97.15 ± 0.11  | 5.3          |     | 97.14 ± 0.11    | 16.1         |      |
| w6a                 | *  | 97.64 ± 0.13  | 16.9 |   | 97.23 ± 0.09  | 5.7          |     | 97.22 ± 0.11    | 16.1         |      |
| w7a                 | *  | 97.56 ± 0.11  | 14.8 |   | 97.22 ± 0.12  | 5.6          |     | 97.21 ± 0.11    | 16.1         |      |
| w8a                 | *  | 97.41 ± 0.14  | 14.1 |   | 97.15 ± 0.10  | 6.0          |     | 97.12 ± 0.10    | 16.5         |      |
| averages            | 25 | 80.63 ± 3.94  | 11.8 |   | 7             | 80.21 ± 3.91 | 9.8 | 8               | 79.79 ± 3.82 | 31.4 |

Supplementary Material for IPBoost

Table 11. Averages of the *train* accuracies and standard deviations for three algorithms with  $\rho = 0.01$  for 10 different seeds on LIBSVM; best solutions are marked with \*; using class probabilities for prediction and voting.

| name                | IPBoost |               |          | LPBoost |               |          | AdaBoost |              |          |
|---------------------|---------|---------------|----------|---------|---------------|----------|----------|--------------|----------|
|                     |         | score         | <i>L</i> |         | score         | <i>L</i> |          | score        | <i>L</i> |
| a1a                 | *       | 79.97 ± 2.23  | 10.3     |         | 77.41 ± 1.23  | 4.5      |          | 77.31 ±1.00  | 9.3      |
| a2a                 | *       | 79.18 ± 1.86  | 11.8     |         | 76.74 ± 0.92  | 5.4      |          | 76.42 ±0.94  | 9.6      |
| a3a                 | *       | 78.63 ± 1.54  | 13.9     |         | 76.39 ± 0.82  | 4.5      |          | 77.00 ±1.10  | 10.9     |
| a4a                 | *       | 78.68 ± 1.55  | 13.7     |         | 75.90 ± 0.82  | 4.6      |          | 76.84 ±1.07  | 11.0     |
| a5a                 | *       | 79.05 ± 1.57  | 14.7     |         | 76.31 ± 0.80  | 4.4      |          | 77.19 ±0.99  | 11.0     |
| a6a                 | *       | 78.33 ± 1.31  | 11.5     |         | 76.73 ± 0.96  | 4.4      |          | 77.30 ±1.03  | 11.0     |
| a7a                 | *       | 78.30 ± 1.42  | 12.5     |         | 76.37 ± 1.09  | 4.3      |          | 77.11 ±1.09  | 11.0     |
| a8a                 | *       | 79.05 ± 2.84  | 8.2      |         | 76.01 ± 0.32  | 4.2      |          | 76.56 ±0.61  | 11.0     |
| a9a                 | *       | 77.07 ± 1.71  | 5.9      |         | 76.09 ± 0.34  | 3.5      |          | 76.58 ±0.65  | 10.9     |
| australian_scale    | *       | 77.41 ± 9.06  | 11.9     |         | 75.80 ± 8.55  | 8.6      |          | 76.03 ±8.71  | 24.1     |
| breast-cancer_scale | *       | 96.93 ± 1.75  | 15.0     |         | 96.00 ± 1.70  | 12.8     |          | 95.27 ±1.65  | 20.2     |
| cod-rna             | *       | 68.20 ± 4.80  | 3.4      |         | 67.90 ± 3.90  | 3.3      |          | 68.00 ±4.21  | 55.3     |
| colon-cancer        |         | 97.60 ± 1.26  | 5.9      |         | 94.00 ± 1.63  | 5.0      | *        | 100.00 ±0.00 | 58.7     |
| duke                |         | 95.68 ± 2.26  | 5.0      |         | 95.23 ± 2.92  | 4.8      | *        | 100.00 ±0.00 | 56.7     |
| german.numer        | *       | 72.32 ± 2.04  | 9.6      |         | 71.01 ± 1.43  | 5.7      |          | 71.34 ±1.62  | 19.1     |
| gisette_scale       |         | 86.14 ± 4.28  | 33.7     | *       | 88.01 ± 3.94  | 106.5    |          | 82.23 ±3.26  | 95.1     |
| diabetes_scale      | *       | 74.18 ± 3.53  | 19.1     |         | 72.50 ± 3.83  | 18.8     |          | 73.54 ±3.60  | 46.2     |
| fourclass_scale     | *       | 77.33 ± 1.39  | 13.8     |         | 76.55 ± 1.38  | 11.2     |          | 76.41 ±1.40  | 38.0     |
| german.numer_scale  | *       | 72.27 ± 1.99  | 9.3      |         | 71.01 ± 1.43  | 5.7      |          | 71.34 ±1.62  | 19.1     |
| heart_scale         | *       | 81.06 ± 8.01  | 12.5     |         | 77.87 ± 6.09  | 12.6     |          | 77.13 ±5.64  | 20.1     |
| ijcnn1              | *       | 90.59 ± 0.60  | 28.9     |         | 90.54 ± 0.56  | 33.2     |          | 90.34 ±0.06  | 71.6     |
| ionosphere_scale    |         | 98.72 ± 1.75  | 44.9     | *       | 98.86 ± 1.65  | 47.0     |          | 97.62 ±2.07  | 49.1     |
| leu                 |         | 98.42 ± 1.84  | 3.3      |         | 92.37 ± 3.15  | 2.7      | *        | 100.00 ±0.00 | 36.9     |
| liver-disorders     | *       | 88.55 ± 1.27  | 23.5     |         | 86.69 ± 1.72  | 26.4     |          | 84.83 ±1.81  | 37.5     |
| madelon             |         | 60.06 ± 2.92  | 21.7     |         | 64.33 ± 1.21  | 85.7     | *        | 67.28 ±1.79  | 97.2     |
| mushrooms           | *       | 93.52 ± 4.28  | 14.6     |         | 82.54 ± 7.77  | 8.1      |          | 77.60 ±6.31  | 9.7      |
| phishing            | *       | 81.05 ± 11.22 | 7.5      |         | 77.00 ± 12.43 | 3.9      |          | 71.67 ±8.51  | 8.0      |
| skin_nonskin        |         | 83.30 ± 4.67  | 4.2      |         | 83.03 ± 4.88  | 4.2      | *        | 83.33 ±4.64  | 50.4     |
| sonar_scale         |         | 99.82 ± 0.40  | 52.4     | *       | 99.88 ± 0.25  | 54.2     |          | 99.46 ±0.82  | 64.6     |
| splice              | *       | 67.92 ± 6.69  | 7.1      |         | 66.70 ± 6.37  | 11.6     |          | 66.89 ±6.23  | 21.0     |
| svmguide1           | *       | 93.35 ± 3.77  | 27.7     |         | 93.10 ± 3.71  | 29.0     |          | 92.92 ±3.71  | 62.9     |
| svmguide3           |         | 81.33 ± 1.90  | 22.4     |         | 80.88 ± 1.67  | 34.1     | *        | 81.36 ±2.38  | 70.7     |
| w1a                 | *       | 98.49 ± 0.21  | 33.8     |         | 97.47 ± 0.18  | 5.1      |          | 97.31 ±0.15  | 14.9     |
| w2a                 | *       | 98.19 ± 0.25  | 32.3     |         | 97.26 ± 0.21  | 5.4      |          | 97.13 ±0.10  | 15.5     |
| w3a                 | *       | 98.17 ± 0.24  | 35.3     |         | 97.30 ± 0.13  | 5.2      |          | 97.25 ±0.12  | 16.1     |
| w4a                 | *       | 97.99 ± 0.18  | 30.6     |         | 97.33 ± 0.15  | 5.4      |          | 97.21 ±0.10  | 16.1     |
| w5a                 | *       | 97.94 ± 0.20  | 25.4     |         | 97.34 ± 0.11  | 5.4      |          | 97.28 ±0.10  | 16.1     |
| w6a                 | *       | 97.73 ± 0.16  | 25.7     |         | 97.17 ± 0.11  | 5.8      |          | 97.11 ±0.13  | 16.1     |
| w7a                 | *       | 97.62 ± 0.13  | 20.2     |         | 97.21 ± 0.12  | 5.8      |          | 97.16 ±0.11  | 16.1     |
| w8a                 | *       | 97.64 ± 0.10  | 21.7     |         | 97.23 ± 0.10  | 6.2      |          | 97.19 ±0.11  | 16.5     |
| averages            | 31      | 85.69 ± 2.48  | 18.1     | 3       | 84.20 ± 2.26  | 15.5     | 6        | 84.36 ±1.99  | 31.4     |

Supplementary Material for IPBoost

Table 12. Averages of the *test* accuracies and standard deviations for three algorithms with  $\rho = 0.01$  for 10 different seeds on LIBSVM; best solutions are marked with \*; using class probabilities for prediction and voting.

| name                | IPBoost |               |          | LPBoost |               |          | AdaBoost |               |          |
|---------------------|---------|---------------|----------|---------|---------------|----------|----------|---------------|----------|
|                     |         | score         | <i>L</i> |         | score         | <i>L</i> |          | score         | <i>L</i> |
| a1a                 | *       | 78.47 ± 3.33  | 10.3     |         | 76.73 ± 2.94  | 4.5      |          | 76.04 ± 3.30  | 9.3      |
| a2a                 | *       | 77.75 ± 1.97  | 11.8     |         | 76.03 ± 2.36  | 5.4      |          | 75.67 ± 1.57  | 9.6      |
| a3a                 | *       | 78.02 ± 1.50  | 13.9     |         | 75.59 ± 1.56  | 4.5      |          | 76.84 ± 1.03  | 10.9     |
| a4a                 | *       | 77.63 ± 2.54  | 13.7     |         | 75.23 ± 1.75  | 4.6      |          | 76.18 ± 1.72  | 11.0     |
| a5a                 | *       | 77.96 ± 1.64  | 14.7     |         | 75.59 ± 1.86  | 4.4      |          | 76.72 ± 1.77  | 11.0     |
| a6a                 | *       | 78.72 ± 1.32  | 11.5     |         | 77.42 ± 1.04  | 4.4      |          | 77.84 ± 1.31  | 11.0     |
| a7a                 | *       | 78.40 ± 1.55  | 12.5     |         | 76.52 ± 1.10  | 4.3      |          | 77.28 ± 1.39  | 11.0     |
| a8a                 | *       | 78.93 ± 2.79  | 8.2      |         | 75.97 ± 0.49  | 4.2      |          | 76.46 ± 0.64  | 11.0     |
| a9a                 | *       | 77.06 ± 2.04  | 5.9      |         | 76.24 ± 0.58  | 3.5      |          | 76.54 ± 0.82  | 10.9     |
| australian_scale    | *       | 73.84 ± 9.59  | 11.9     |         | 72.90 ± 9.29  | 8.6      |          | 72.61 ± 9.54  | 24.1     |
| breast-cancer_scale | *       | 93.38 ± 2.48  | 15.0     |         | 93.16 ± 1.43  | 12.8     |          | 93.01 ± 2.48  | 20.2     |
| cod-rna             | *       | 68.19 ± 4.87  | 3.4      |         | 67.82 ± 3.63  | 3.3      |          | 67.94 ± 4.03  | 55.3     |
| colon-cancer        |         | 73.33 ± 14.05 | 5.9      |         | 73.33 ± 10.97 | 5.0      | *        | 76.67 ± 14.59 | 58.7     |
| duke                |         | 95.53 ± 2.17  | 5.0      |         | 94.74 ± 3.28  | 4.8      | *        | 100.00 ± 0.00 | 56.7     |
| german.numer        | *       | 71.90 ± 3.43  | 9.6      |         | 71.85 ± 2.97  | 5.7      |          | 71.80 ± 3.32  | 19.1     |
| gisetete_scale      |         | 84.72 ± 4.34  | 33.7     | *       | 86.27 ± 3.89  | 106.5    |          | 80.40 ± 3.62  | 95.1     |
| diabetes_scale      |         | 65.49 ± 4.03  | 19.1     |         | 65.49 ± 4.51  | 18.8     | *        | 66.80 ± 5.07  | 46.2     |
| fourclass_scale     |         | 71.10 ± 4.44  | 13.8     | *       | 72.73 ± 3.72  | 11.2     |          | 72.09 ± 4.02  | 38.0     |
| german.numer_scale  | *       | 72.00 ± 3.32  | 9.3      |         | 71.85 ± 2.97  | 5.7      |          | 71.80 ± 3.32  | 19.1     |
| heart_scale         | *       | 73.15 ± 5.03  | 12.5     |         | 68.89 ± 5.00  | 12.6     |          | 69.81 ± 5.09  | 20.1     |
| ijcnn1              | *       | 90.46 ± 0.83  | 28.9     |         | 90.44 ± 0.78  | 33.2     |          | 90.30 ± 0.28  | 71.6     |
| ionosphere_scale    |         | 83.43 ± 5.05  | 44.9     |         | 83.14 ± 6.05  | 47.0     | *        | 86.71 ± 4.86  | 49.1     |
| leu                 |         | 70.59 ± 7.59  | 3.3      |         | 73.24 ± 8.48  | 2.7      | *        | 80.88 ± 7.50  | 36.9     |
| liver-disorders     | *       | 56.30 ± 3.17  | 23.5     |         | 55.25 ± 2.62  | 26.4     |          | 55.90 ± 3.02  | 37.5     |
| madelon             |         | 53.18 ± 2.92  | 21.7     | *       | 53.42 ± 3.73  | 85.7     |          | 52.12 ± 1.82  | 97.2     |
| mushrooms           | *       | 93.69 ± 4.27  | 14.6     |         | 82.61 ± 7.74  | 8.1      |          | 77.70 ± 6.29  | 9.7      |
| phishing            | *       | 80.56 ± 11.70 | 7.5      |         | 76.88 ± 12.50 | 3.9      |          | 71.27 ± 8.52  | 8.0      |
| skin_nonskin        |         | 83.28 ± 4.74  | 4.2      |         | 83.05 ± 4.94  | 4.2      | *        | 83.35 ± 4.71  | 50.4     |
| sonar_scale         |         | 65.85 ± 9.55  | 52.4     | *       | 66.83 ± 6.82  | 54.2     |          | 63.90 ± 11.14 | 64.6     |
| splice              |         | 65.13 ± 7.19  | 7.1      | *       | 65.46 ± 7.41  | 11.6     |          | 65.19 ± 6.65  | 21.0     |
| svmguide1           |         | 90.20 ± 4.59  | 27.7     |         | 89.98 ± 4.56  | 29.0     | *        | 90.40 ± 5.01  | 62.9     |
| svmguide3           |         | 65.37 ± 16.97 | 22.4     | *       | 69.76 ± 14.82 | 34.1     |          | 63.90 ± 23.36 | 70.7     |
| w1a                 |         | 97.09 ± 0.25  | 33.8     | *       | 97.14 ± 0.14  | 5.1      |          | 97.11 ± 0.14  | 14.9     |
| w2a                 | *       | 97.41 ± 0.17  | 32.3     |         | 97.24 ± 0.10  | 5.4      |          | 97.15 ± 0.11  | 15.5     |
| w3a                 | *       | 97.54 ± 0.25  | 35.3     |         | 97.19 ± 0.12  | 5.2      |          | 97.18 ± 0.11  | 16.1     |
| w4a                 | *       | 97.55 ± 0.17  | 30.6     |         | 97.22 ± 0.12  | 5.4      |          | 97.17 ± 0.12  | 16.1     |
| w5a                 | *       | 97.55 ± 0.20  | 25.4     |         | 97.16 ± 0.13  | 5.4      |          | 97.14 ± 0.11  | 16.1     |
| w6a                 | *       | 97.70 ± 0.17  | 25.7     |         | 97.24 ± 0.10  | 5.8      |          | 97.22 ± 0.11  | 16.1     |
| w7a                 | *       | 97.59 ± 0.11  | 20.2     |         | 97.23 ± 0.12  | 5.8      |          | 97.21 ± 0.11  | 16.1     |
| w8a                 | *       | 97.47 ± 0.11  | 21.7     |         | 97.15 ± 0.10  | 6.2      |          | 97.12 ± 0.10  | 16.5     |
| averages            | 26      | 80.59 ± 3.91  | 18.1     | 7       | 79.80 ± 3.67  | 15.5     | 7        | 79.79 ± 3.82  | 31.4     |
